# Supplementary material for: Reference Genomes from Distantly Related Species Can Be Used for Discovery of Single Nucleotide Polymorphisms to Inform Conservation Management
Source: PubMed Central journal article supplement (PMC6356778; doi:10.3390/genes10010009), 2018-12-22
Supplement: genes-10-00009-s001.pdf [file genes-10-00009-s001.pdf]

Supplement: *Reference genomes from distantly related species can be used for discovery of Single Nucleotide Polymorphisms to inform conservation management*

Stephanie J. Galla, Natalie J. Forsdick, Liz Brown, Marc P. Hoepfner, Michael Knapp, Richard F. Maloney, Roger Moraga, Anna W. Santure and Tammy E. Steeves

Table S1 -- Samples used in Genotyping-by-Sequencing and resequencing analyses.

| Sample ID | Tissue Type | Year Collected | GBS - Batch 1 | GBS - Batch 2 | Resequencing | Description       |
|-----------|-------------|----------------|---------------|---------------|--------------|-------------------|
| 240       | Blood       | 2015           | ✓             |               | ✓            | Captive Parent    |
| 451       | Blood       | 2015           | ✓             |               | ✓            | Captive Parent    |
| 452       | Blood       | 2015           | ✓             | ✓             | ✓            | Captive Parent    |
| 453       | Blood       | 2015           | ✓             | ✓             | ✓            | Captive Parent    |
| 639       | Blood       | 2015           | ✓             | ✓             | ✓            | Captive Parent    |
| 1360      | Blood       | 2015           | ✓             |               |              | Captive Parent    |
| 1376      | Blood       | 2015           | ✓             | ✓             | ✓            | Captive Parent    |
| 1377      | Blood       | 2015           | ✓             | ✓             | ✓            | Captive Parent    |
| 1409      | Blood       | 2015           | ✓             |               |              | Captive Parent    |
| 1429      | Blood       | 2015           | ✓             | ✓             | ✓            | Captive Parent    |
| 1469      | Blood       | 2015           | ✓             | ✓             | ✓            | Captive Parent    |
| 1565      | Blood       | 2015           | ✓             | ✓             | ✓            | Captive Parent    |
| 1659      | Blood       | 2015           | ✓             | ✓             | ✓            | Captive Parent    |
| 1661      | Blood       | 2015           | ✓             | ✓             | ✓            | Captive Parent    |
| 1736      | Blood       | 2015           | ✓             |               |              | Wild Offspring    |
| 1738      | Blood       | 2015           | ✓             |               | ✓            | Wild Offspring    |
| 1744      | Blood       | 2015           | ✓             |               |              | Wild Offspring    |
| 1762      | Blood       | 2015           | ✓             |               |              | Wild Offspring    |
| 1763      | Blood       | 2015           | ✓             |               |              | Wild Offspring    |
| 1764      | Blood       | 2015           | ✓             |               |              | Wild Offspring    |
| 1860      | Blood       | 2015           | ✓             |               |              | Wild Offspring    |
| 1864      | Blood       | 2015           | ✓             |               |              | Wild Offspring    |
| 1872      | Blood       | 2015           | ✓             | ✓             | ✓            | Wild Offspring    |
| 1892      | Blood       | 2016           |               |               | ✓            | Wild Offspring    |
| 1903      | Blood       | 2016           | ✓             |               | ✓            | Captive Offspring |
| 1904      | Blood       | 2016           | ✓             |               |              | Captive Offspring |
| 1905      | Blood       | 2016           | ✓             |               |              | Captive Offspring |
| 1906      | Blood       | 2016           | ✓             |               |              | Captive Offspring |
| 1907      | Blood       | 2016           | ✓             |               |              | Captive Offspring |
| 1908      | Blood       | 2016           | ✓             |               |              | Captive Offspring |
| 1915      | Blood       | 2016           | ✓             |               |              | Captive Offspring |
| 1920      | Blood       | 2016           | ✓             |               |              | Captive Offspring |
| 1921      | Blood       | 2016           | ✓             |               | ✓            | Captive Offspring |
| 1931      | Blood       | 2016           | ✓             |               |              | Captive Offspring |
| 1932      | Blood       | 2016           | ✓             |               |              | Captive Offspring |
| 1934      | Blood       | 2016           |               |               | ✓            | Wild Offspring    |
| 1936      | Blood       | 2016           |               |               | ✓            | Wild Offspring    |
| 1944      | Blood       | 2016           | ✓             |               |              | Captive Offspring |
| 1947      | Blood       | 2016           | ✓             |               |              | Captive Offspring |
| 1948      | Blood       | 2016           | ✓             |               |              | Captive Offspring |
| 1949      | Blood       | 2016           | ✓             |               |              | Captive Offspring |

|        |        |      |   |   |   |                   |
|--------|--------|------|---|---|---|-------------------|
| 1950   | Blood  | 2016 | ✓ |   |   | Captive Offspring |
| 1952   | Blood  | 2016 | ✓ |   |   | Captive Offspring |
| 1953   | Blood  | 2016 | ✓ |   |   | Captive Offspring |
| 1957   | Blood  | 2016 | ✓ |   |   | Captive Offspring |
| 1964   | Blood  | 2016 | ✓ |   |   | Captive Offspring |
| 1966   | Blood  | 2016 | ✓ |   | ✓ | Captive Offspring |
| 1969   | Blood  | 2016 | ✓ |   |   | Captive Offspring |
| 1970   | Blood  | 2016 | ✓ |   |   | Captive Offspring |
| 1971   | Blood  | 2016 | ✓ |   |   | Captive Offspring |
| 1975   | Blood  | 2016 | ✓ |   | ✓ | Captive Offspring |
| 1976   | Blood  | 2016 | ✓ |   |   | Captive Offspring |
| 15_128 | Muscle | 2016 | ✓ |   |   | Captive Offspring |
| 15_129 | Muscle | 2016 | ✓ |   |   | Captive Offspring |
| 15_130 | Muscle | 2016 | ✓ |   |   | Captive Offspring |
| 1980   | Blood  | 2017 |   |   | ✓ | Wild Offspring    |
| 1993   | Blood  | 2017 |   | ✓ |   | Captive Offspring |
| 1994   | Blood  | 2017 |   | ✓ |   | Captive Offspring |
| 1995   | Blood  | 2017 |   | ✓ |   | Captive Offspring |
| 1996   | Blood  | 2017 |   | ✓ |   | Captive Offspring |
| 1998   | Blood  | 2017 |   | ✓ |   | Captive Offspring |
| 2000   | Blood  | 2017 |   | ✓ | ✓ | Captive Offspring |
| 2004   | Blood  | 2017 |   | ✓ | ✓ | Captive Offspring |
| 2012   | Blood  | 2017 |   |   | ✓ | Wild Offspring    |
| 2013   | Blood  | 2017 |   | ✓ |   | Captive Offspring |
| 2014   | Blood  | 2017 |   | ✓ |   | Captive Offspring |
| 2015   | Blood  | 2017 |   | ✓ |   | Captive Offspring |
| 2016   | Blood  | 2017 |   | ✓ | ✓ | Captive Offspring |
| 2023   | Blood  | 2017 |   |   | ✓ | Wild Offspring    |
| 2028   | Blood  | 2017 |   | ✓ |   | Captive Offspring |
| 2029   | Blood  | 2017 |   | ✓ |   | Captive Offspring |
| 2030   | Blood  | 2017 |   | ✓ |   | Captive Offspring |
| 2032   | Blood  | 2017 |   |   | ✓ | Wild Offspring    |
| 2034   | Blood  | 2017 |   | ✓ |   | Captive Offspring |
| 2035   | Blood  | 2017 |   |   | ✓ | Wild Offspring    |
| 2050   | Blood  | 2017 |   | ✓ |   | Captive Offspring |
| 2054   | Blood  | 2017 |   | ✓ |   | Captive Offspring |
| 2057   | Blood  | 2017 |   | ✓ |   | Captive Offspring |
| 2058   | Blood  | 2017 |   | ✓ |   | Captive Offspring |
| 2059   | Blood  | 2017 |   | ✓ |   | Captive Offspring |
| 2074   | Blood  | 2017 |   |   | ✓ | Wild Offspring    |
| 2078   | Blood  | 2017 |   | ✓ |   | Captive Offspring |
| 2081   | Blood  | 2017 |   | ✓ | ✓ | Captive Offspring |
| 2091   | Blood  | 2017 |   |   | ✓ | Wild Offspring    |
| 2110   | Blood  | 2017 |   | ✓ |   | Captive Offspring |
| 2111   | Blood  | 2017 |   | ✓ |   | Captive Offspring |
| 2112   | Blood  | 2017 |   | ✓ |   | Captive Offspring |
| 2115   | Blood  | 2017 |   | ✓ |   | Captive Offspring |
| 2118   | Blood  | 2017 |   | ✓ |   | Captive Offspring |
| 2119   | Blood  | 2017 |   | ✓ |   | Captive Offspring |
| 2120   | Blood  | 2017 |   | ✓ |   | Captive Offspring |
| 2121   | Blood  | 2017 |   | ✓ | ✓ | Captive Offspring |

|        |               |      |  |   |   |                   |
|--------|---------------|------|--|---|---|-------------------|
| 2122   | Blood         | 2017 |  | ✓ |   | Captive Offspring |
| 2123   | Blood         | 2017 |  | ✓ |   | Captive Offspring |
| 2124   | Blood         | 2017 |  | ✓ | ✓ | Captive Offspring |
| 2125   | Blood         | 2017 |  | ✓ | ✓ | Captive Offspring |
| 15_114 | Germinal Disk | 2017 |  | ✓ | ✓ | Captive Offspring |
| 16_05  | Germinal Disk | 2017 |  | ✓ |   | Captive Offspring |

Table S2. Cost associated with genome sequencing and alignment. Prices for sequencing from competitive sequencing providers (see <https://genohub.com/ngs/>). Compute instance and storage costs from competitive New Zealand-based cloud computing services (see <https://catalystcloud.nz>). Work hours computed bioinformatician analysis time at at €58 per hour.

| Genome Type            | Genome Description                                                                                                                                                                                                                                                                                                                                   | Sequencing | Compute Instance and Storage | Work hours | TOTAL COST |
|------------------------|------------------------------------------------------------------------------------------------------------------------------------------------------------------------------------------------------------------------------------------------------------------------------------------------------------------------------------------------------|------------|------------------------------|------------|------------|
| Basic Genome           | 1 lane of Illumina sequencing; 5 days of 256 Gb memory instance for initial assembly plus refinement; 2Tb temporary storage; 60 hours of bioinformatician analysis time.                                                                                                                                                                             | € 1,750    | € 315                        | € 3,500    | € 5,565    |
| Short Read Full Genome | 100x coverage pair-end reads and 2 mate-pair libraries; 5 days of 256 Gb memory instance for pair-end assembly and 9 days of 128 Gb instance for multiple scaffolding iterations; 2 Tb temporary storage; 100 hours of bioinformatician analysis time.                                                                                               | € 9,335    | € 370                        | € 5,835    | € 15,540   |
| Multi-tech Genome      | 100x coverage pair-end reads, multiple mate-pair libraries, and 10x coverage PacBio sequencing; 2 Tb temp storage. 2 days with 6 instances of 32 Gb machines for PacBio error correction and 2 days with 6 instances for gap filling/completion with PacBio; 160h of bioinformatician analysis time.                                                 | € 17,500   | € 875                        | € 9,335    | € 27,710   |
| Long-read Genome       | 50x PacBio sequencing, 1 lane of Illumina sequencing, and 5 flowcells of Oxford Nanopore; 14 days of 256 Gb instance for long read assemblies, followed by 5 days of 256Gb instance for short read assemblies, and 5 days of 128 Gb instance for integration of all three technologies; 3Tb of storage; 180 hours of bioinformatician analysis time. | € 46,670   | € 1,460                      | € 10,500   | € 58,630   |

### S1.1 - Lithium Chloride DNA Extractions Protocol

A small piece of dried blood or tissue was isolated for each sample. 250µl of lysis buffer (1.0M tris, 0.5M EDTA, 5.0M NaCl, 10% SDS, 50mg/mL proteinase K, and molecular-grade RNase-free water) was added and the reaction was placed on a 55°C heat block overnight (at least 6 hours). When fully digested, 250µl of 5M LiCl solution was added to the digested blood or tissue. Samples were inverted for 1 minute. In a fume hood, 500µl of 24:1 chloroform:isoamyl alcohol was added to each tube. Samples were inverted for 5 minutes. Samples were then centrifuged at 11,000 RPM for 3 minutes, where samples separate into two phases.

The complete top phase of sample was transferred into a new tube and 250µl of 5M LiCl solution was added. Samples were inverted for 1 minute. In a fume hood, 500µl of 24:1 chloroform:isoamyl alcohol was added to each tube. Samples were mixed by inverting for 2 minutes. Samples were then centrifuged at 11,000 rpm for 1 minute, where samples separate into two phases. 500µl of the top phase was transferred to a new 1.5ml tube, being careful not to touch the intermediate film between the two phases. 1ml of cold (-20°C) absolute ethanol was added to each sample. Samples were inverted gently as DNA precipitates out of solution. Samples were then placed in the -20°C freezer for a minimum of 2 hours. Once out of the freezer, tubes were centrifuged for 10 minutes at 12,000 rpm at -20°C.

The supernate in each sample was poured off into a waste container, being careful not to disturb the pellet. 500µl of 70% ethanol was added to each sample to wash the pellet. The pellet was fished out using a pipette tip and transferred to a clean tube. After the pellet air dried, the DNA was resuspended in 50µL of TE8 buffer. The samples were incubated for 37°C for 40 minutes to allow for improved re-suspension. Samples were then stored at 4°C until used, the permanently at -20°C.
